# Supplementary material
Source: PubMed Central journal article supplement (PMC8317618)

# Nonresponder PD-1 Monotherapy

Before  
Therapy

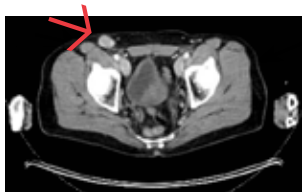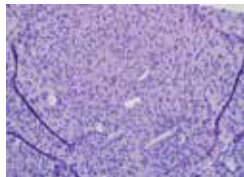

After  
Therapy

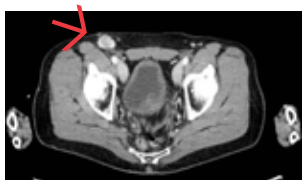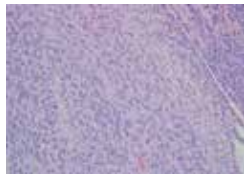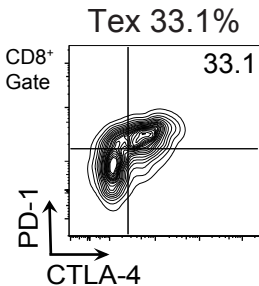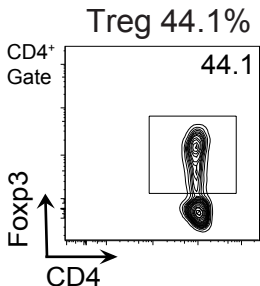

Supplement: NIHMS1721256-supplement-neoadjFigS1.pdf [file NIHMS1721256-supplement-neoadjFigS1.pdf]
